# Supplementary material for: Human memory CD8 T cell effector potential is epigenetically preserved during in vivo homeostasis
Source: PubMed Central journal article supplement — J Exp Med. 2017 Jun 5;214(6):1593–606. doi: 10.1084/jem.20161760 (PMC5461005; doi:10.1084/jem.20161760), 2017-06-05
Supplement: JEM_20161760_sm.pdf [file JEM_20161760_sm.pdf]

SUPPLEMENTAL MATERIAL

Abdelsamed et al., <https://doi.org/10.1084/jem.20161760>

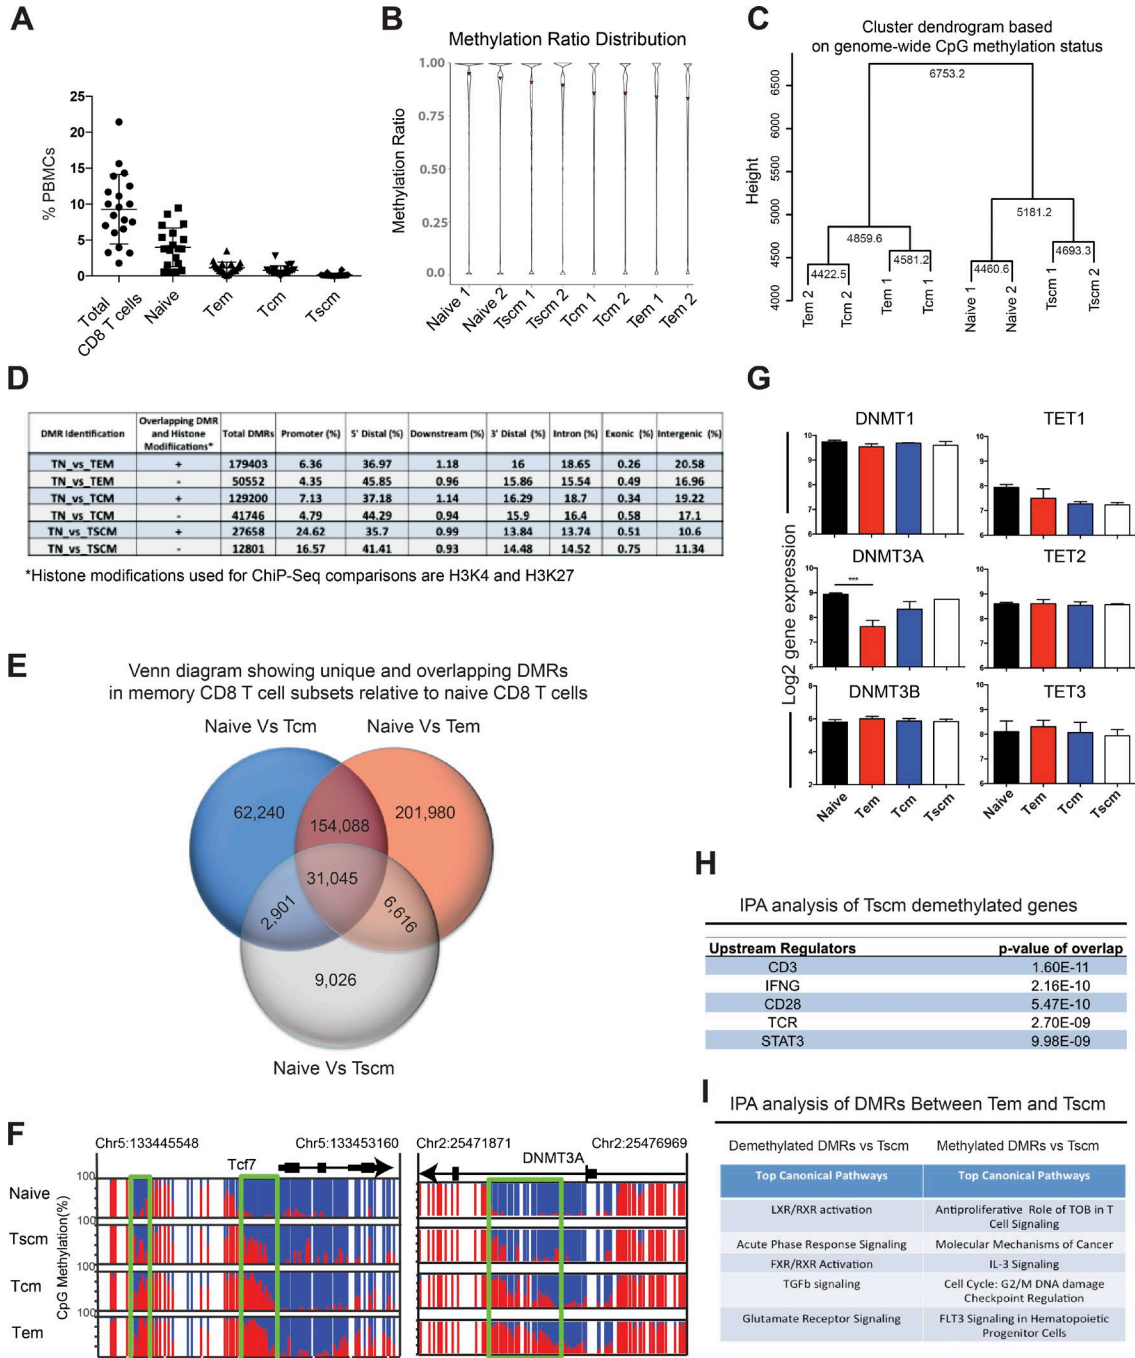

Figure S1. **Bioinformatics analyses of genome-wide naive and memory CD8 T cell DNA methylation datasets.** (A) Scatter plot showing the percentage of total CD8 T cells and naive and memory CD8<sup>+</sup> T cell subsets in human peripheral blood ( $n = 20$  healthy donors). (B) Violin plots showing the methylation distribution (number of methylated CpGs per total number of CpGs) across the genomes of naive and memory CD8<sup>+</sup> T cell subsets from two donors. (C) Dendrogram of DMRs showing cluster analysis for two replicates for each cell population (naive, T<sub>EM</sub>, T<sub>CM</sub>, and T<sub>SCM</sub> CD8 T cells). (D) Summary table of the percentage of overlap and relative genomic location between histone modifications and memory-associated DMRs. (E) Venn diagram showing the unique and overlapping DMRs in memory CD8 T cell subsets relative to naive CD8 T cells. (F) Normalized plot of CpG methylation at sites surrounding and within DMRs in the *DNMT3A* and *TCF7* loci obtained from WGBS analysis. Red and blue lines depict methylation and demethylation of CpG sites, respectively. (G) Log<sub>2</sub> gene expression data (means ± SEM) for DNMT and TET enzymes among naive and memory T cell subsets ( $n = 3$  healthy donors) obtained from NCBI Gene Expression Omnibus database, submitted by Gattinoni et al. (2011). (H) Table of IPA analysis shows the upstream regulators of demethylated DMRs in T<sub>SCM</sub> cells compared with those in naive CD8 T cells. (I) Table of IPA analyses shows the top canonical pathways of demethylated and methylated DMRs in T<sub>EM</sub> cells compared with T<sub>SCM</sub> CD8 T cells.

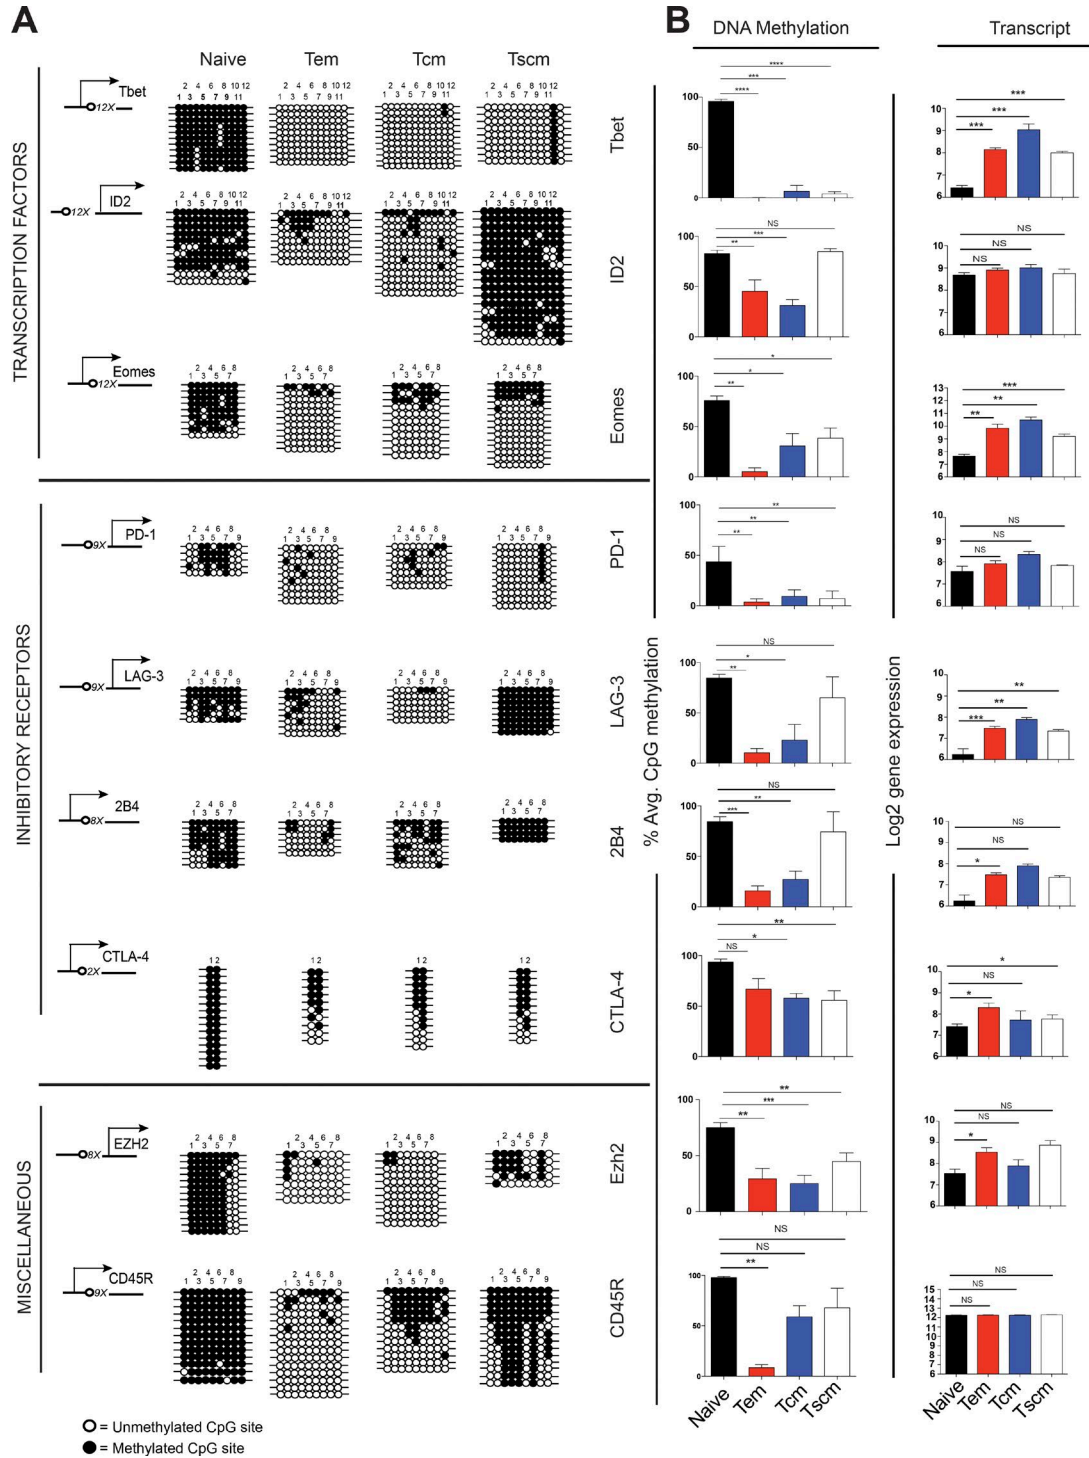

Figure S2. **Validation of unique differential methylation programming at memory and effector-associated loci in memory CD8 T cells.** (A) Representative bisulfite sequencing DNA methylation analysis of transcription factor loci (*T-BET*, *EOMES*, and *ID2*), inhibitory receptor loci (*PD-1*, *LAG-3*, *2B4*, and *CTLA-4*), histone methyltransferase *EZH2*, and *CD45R* tyrosine phosphatase (isoform C). Bisulfite sequencing was performed using genomic DNA from purified (>95% purity), naive,  $T_{EM}$ ,  $T_{CM}$ , and  $T_{SCM}$  CD8<sup>+</sup> T cells. Black and white circles depict methylated and demethylated CpG sites, respectively. Each horizontal line represents a clone, whereas vertical lines represent CpG sites. (B) Bar graphs showing the mean percentage of CpG methylation (means  $\pm$  SEM) for each locus ( $n = 3-6$  healthy donors) and  $\log_2$  gene expression data (means  $\pm$  SEM) for each locus ( $n = 3$  healthy donors) obtained from NCBI Gene Expression Omnibus database, submitted by Gattinoni et al. (2011). \*,  $P < 0.05$ ; \*\*,  $P < 0.01$ ; \*\*\*,  $P < 0.001$ ; \*\*\*\*,  $P < 0.0001$ ; considered significant using an unpaired Student's *t* test. NS, not significant.

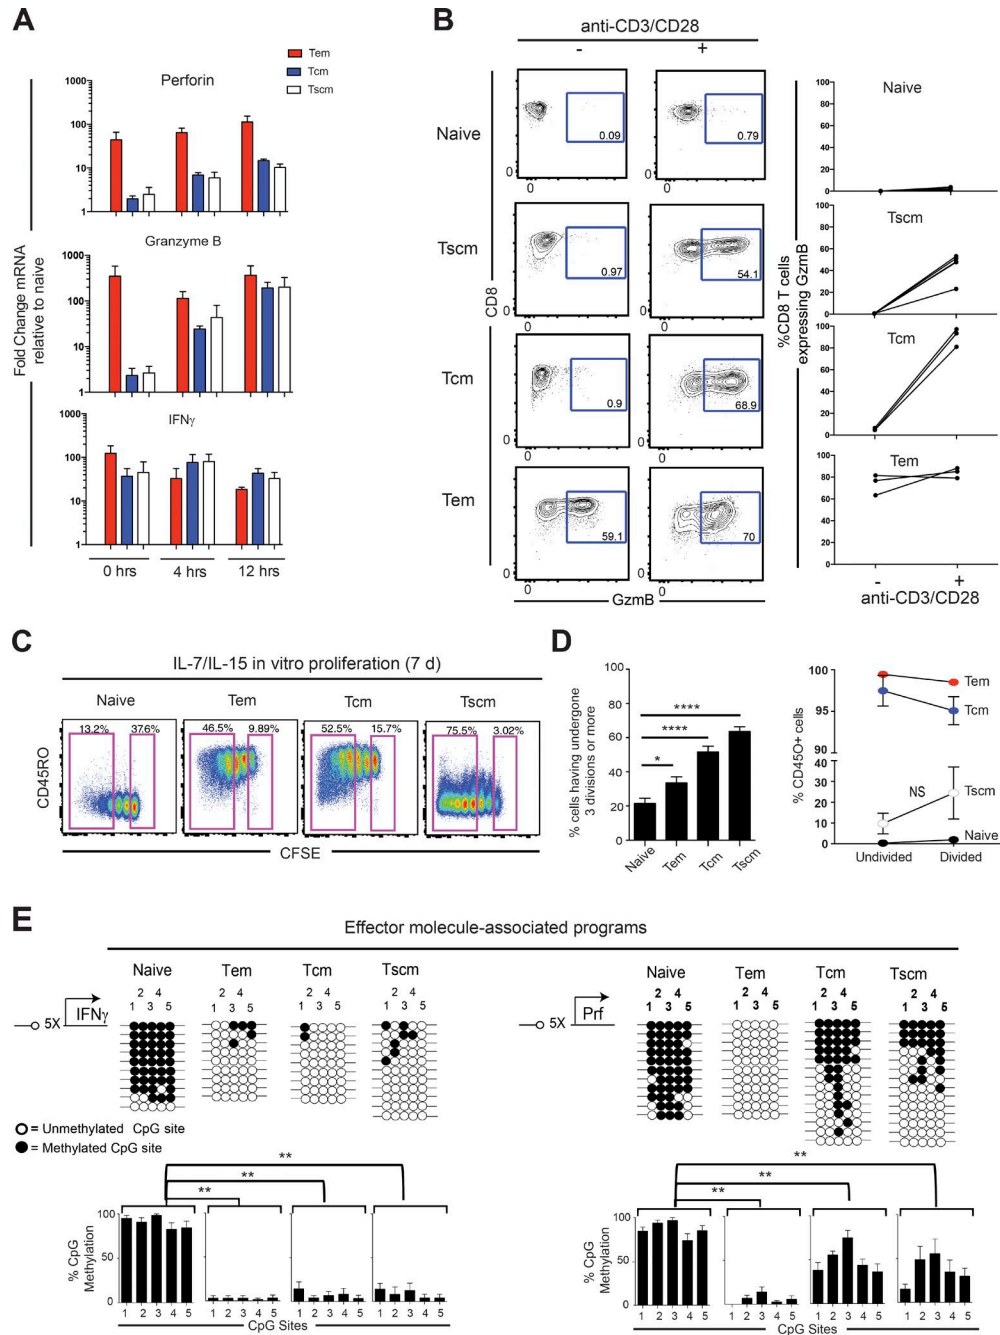

Figure S3. **Memory CD8 T cells are poised to elicit effector molecule expression.** (A) Expression kinetics of the transcripts encoding for *IFN $\gamma$* , *GZMB*, and *PRF1* at the indicated time points (0, 4, and 12 h) after anti-CD3/CD28 stimulation. Data represent mean relative expression  $\pm$  SEM of three independent experiments. Values are calibrated against naive T cells at each time point. (B) Gzmb intracellular expression levels after 18-h stimulation with anti-CD3/CD28 beads. Representative flow cytometric plots (left) and paired analysis (right) are shown. (C) CFSE dilution from one representative donor, showing proliferation of sorted CD8 T cell subsets after IL-7/IL-15 exposure in vitro for 7 d. The gates indicate the percentage of undivided cells and cells that have undergone three or more divisions. CD45RO expression in undivided and divided, CFSE-labeled, naive,  $T_{EM}$ ,  $T_{CM}$ , and  $T_{SCM}$  CD8 T cells after exposure to IL-7/IL-15 in culture for 7 d. (D, left) Cumulative data from 12 independent experiments are presented as means  $\pm$  SEM of highly proliferating cells (more than three divisions). \*,  $P < 0.05$ ; and \*\*\*\*,  $P < 0.0001$  were considered significant using an unpaired Mann-Whitney  $U$  test. NS, not significant. (right) CD45RO expression. Paired Student's  $t$  test was used, and  $P < 0.05$  was considered significant. NS, not significant. (E, top) DNA methylation profile analysis of the indicated *IFN $\gamma$*  and *Prf1* DMRs in ex vivo isolated CD8 T cell subsets from one representative donor. Each horizontal line represents a clone, and each vertical represents a CpG site. (bottom) Bar graphs showing the percentage of CpG methylation (means  $\pm$  SEM) for each site ( $n = 5$ –6 healthy donors). Mann-Whitney  $U$  test was used. \*\*,  $P < 0.005$  was considered significant. NS, not significant. Statistical comparison was based on the mean value of all CpG sites.

## REFERENCE

Gattinoni, L., E. Lugli, Y. Ji, Z. Pos, C.M. Paulos, M.F. Quigley, J.R. Almeida, E. Gostick, Z. Yu, C. Carpenito, et al. 2011. A human memory T cell subset with stem cell-like properties. *Nat. Med.* 17:1290–1297. <http://dx.doi.org/10.1038/nm.2446>
